# Supplementary material
Source: publisher site journal article supplement (https://www.dovepress.com/article/370255)
Supplement: Supplementary file 1 [file get_supplementary_file.php]

# Supplementary materials

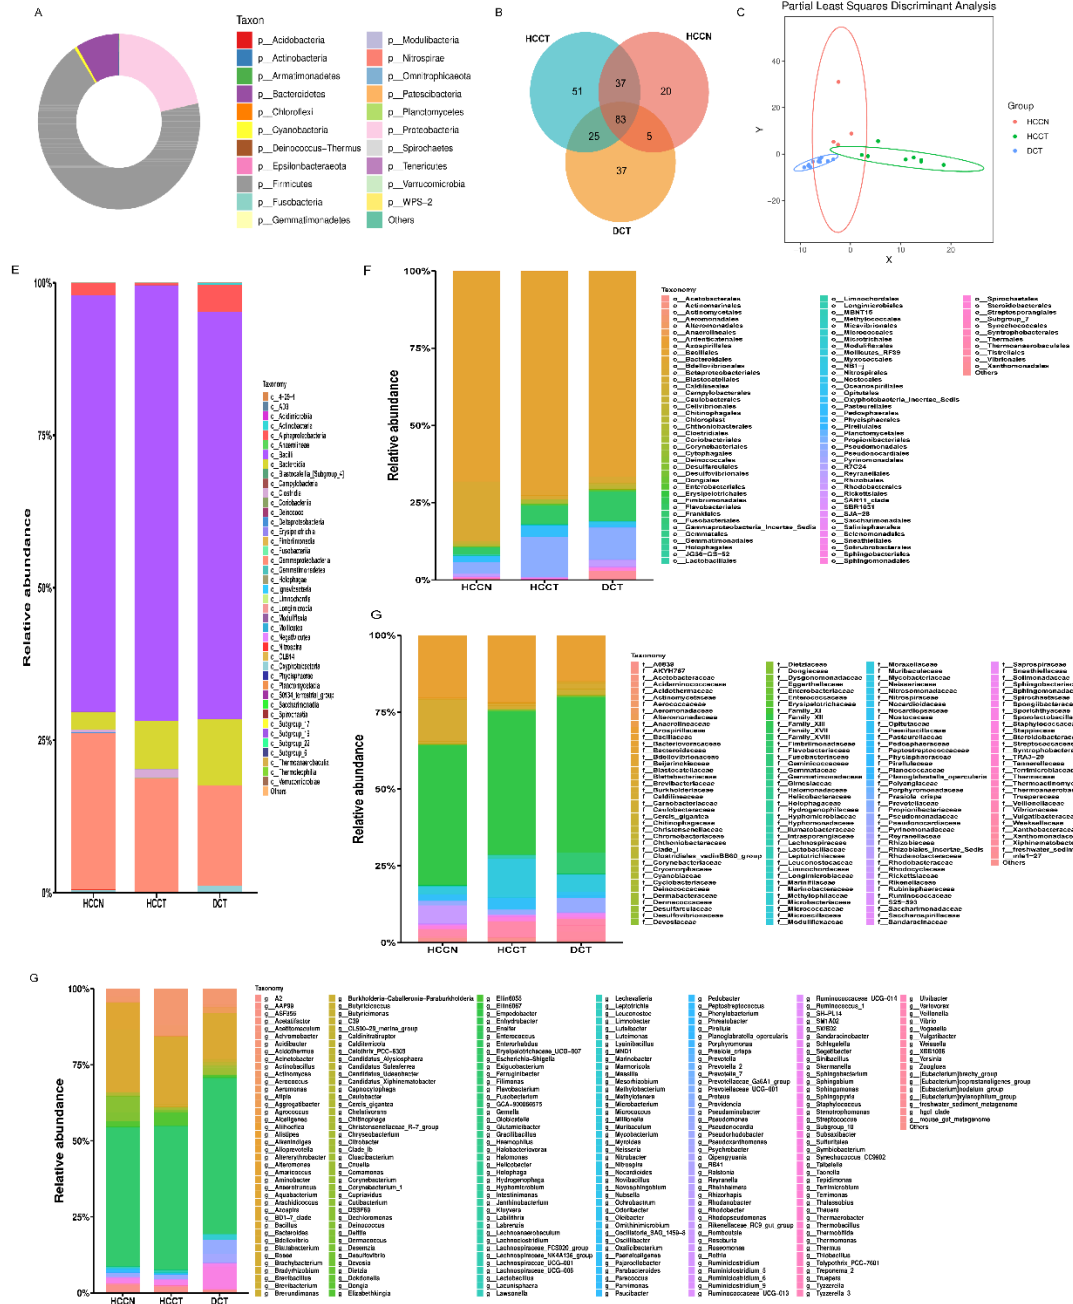

Supplementary Figure S1: Tissue microbiota diversity and composition in the HCC, HCN and DCT. (A) Overall distribution of microbiota. (B) Number of microbiota (>10<sup>-5</sup>). (C)  $\beta$ -diversity of the cohort. (E-G) Relative abundance of microbiota (>10<sup>-5</sup>) at the class, order, family, genus level. HCC: hepatocellular carcinoma tissue. HCN: distal noncancerous tissue. DCT: decompensated cirrhosis tissues.

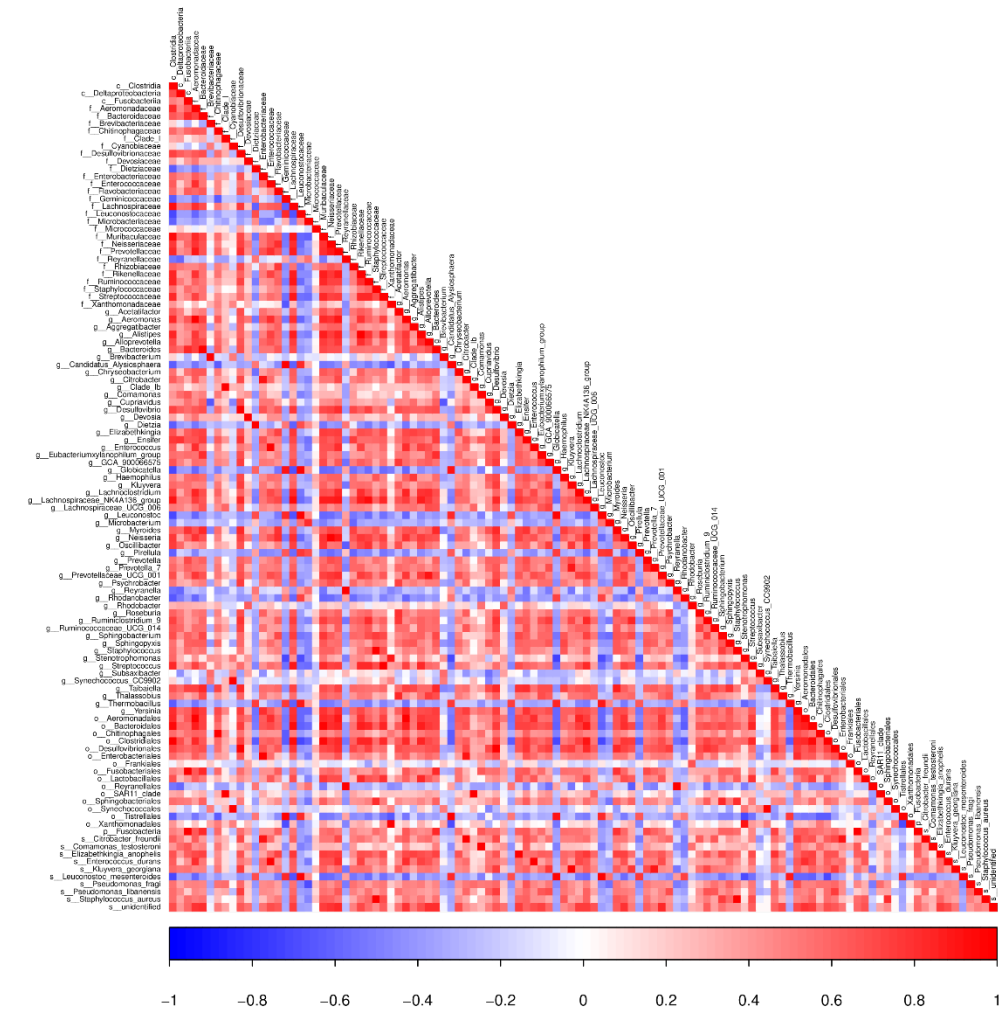

Supplementary Figure S2: Spearman correlation analysis of the tissue bacterial populations with LDA score>2.
